# Supplementary material for: Modulation of HCV reinfection after orthotopic liver transplantation by fibroblast growth factor-2 and other non-interferon mediators
Source: PubMed Central journal article supplement — Gut. 2015 Mar 23;65(6):1015–23. doi: 10.1136/gutjnl-2014-308003 (PMC4893125; doi:10.1136/gutjnl-2014-308003), 2015-03-23
Supplement: gutjnl-2014-308003-s2.pdf [file gutjnl-2014-308003-s2.pdf]

| <b>No.</b> | <b>Mediators</b>                                                                                    | <b><i>in vitro</i> concentrations<br/>(10-fold dilution)</b> | <b>Concentration range<br/>Luminex measurement</b> |
|------------|-----------------------------------------------------------------------------------------------------|--------------------------------------------------------------|----------------------------------------------------|
| 1          | <b>Complement component 5a</b><br>C5a                                                               | 0,5pg/ml – 5000pg/ml                                         | nd                                                 |
| 2          | <b>Chemokine (C-C motif) ligand 2</b><br>CCL-2<br>or <b>monocyte chemotactic protein-1</b><br>MCP-1 | 0,5pg/ml – 5000pg/ml                                         | 5pg/ml – 1656pg/ml                                 |
| 3          | <b>Chemokine (C-C motif) ligand 4</b><br>CCL-4                                                      | 0,5pg/ml – 5000pg/ml                                         | nd                                                 |
| 4          | <b>C-X-C motif chemokine 5</b><br>CXCL-5 or ENA-78                                                  | 20pg/ml – 20000pg/ml and<br>40000pg/ml                       | nd                                                 |
| 5          | <b>Chemokine (C-X-C motif) ligand 9</b><br>CXCL-9                                                   | 10pg/ml – 10000pg/ml and<br>20000pg/ml                       | nd                                                 |
| 6          | <b>Endothelin 1</b><br>ET-1                                                                         | 0,1pg/ml – 1000pg/ml                                         | nd                                                 |
| 7          | <b>Basic fibroblast growth factor</b><br>FGF-b or FGF-2                                             | 0,5pg/ml – 5000pg/ml                                         | 4,3pg/ml – 476pg/ml                                |
| 8          | <b>Hepatocyte growth factor or Scatter factor</b><br>HGF or SF                                      | 0,5pg/ml – 5000pg/ml                                         | 9pg/ml – 4000pg/ml                                 |
| 9          | <b>Intercellular Adhesion Molecule 1 or Cluster of Differentiation 54</b><br>ICAM-1 or CD54         | 0,05ng/ml – 500ng/ml                                         | 43pg/ml – 136680pg/ml                              |
| 10         | <b>Interleukin-10</b><br>IL-10<br>or <b>human cytokine synthesis inhibitory factor</b><br>CSIF      | 0,5pg/ml – 5000pg/ml                                         | 1,5pg/ml – 41pg/ml                                 |
| 11         | <b>Interleukin-16</b><br>IL-16                                                                      | 0,2pg/ml – 2000pg/ml                                         | 15pg/ml – 930pg/ml                                 |
| 12         | <b>Interleukin-17</b><br>IL-17                                                                      | 0,5pg/ml – 5000pg/ml                                         | 2,3pg/ml – 547pg/ml                                |
| 13         | <b>Interleukin-18</b><br>IL-18                                                                      | 0,5pg/ml – 5000pg/ml                                         | 1,6pg/ml – 665pg/ml                                |
| 14         | <b>Interleukin-1 beta or catabolin</b><br>IL-1 $\beta$                                              | 0,6pg/ml – 6000pg/ml                                         | 0,3pg/ml – 89pg/ml                                 |
| 15         | <b>Interleukin-2 receptor alpha chain</b><br>IL-2Ra                                                 | 0,5pg/ml – 5000pg/ml                                         | 20pg/ml – 7440pg/ml                                |
| 16         | <b>Interleukin-32</b><br>IL-32a                                                                     | 0,5pg/ml – 5000pg/ml                                         | nd                                                 |
| 17         | <b>Interleukin-6</b><br>IL-6                                                                        | 0,5pg/ml – 5000pg/ml                                         | 0,8pg/ml – 412pg/ml                                |

|    |                                                                                                                                    |                                      |                             |
|----|------------------------------------------------------------------------------------------------------------------------------------|--------------------------------------|-----------------------------|
| 18 | <b>Interleukin-8</b><br>IL-8                                                                                                       | 0,5pg/ml – 5000pg/ml                 | 3,3pg/ml – 1228pg/ml        |
| 19 | <b>C-X-C motif chemokine 10</b><br>CXCL-10<br>Or <b>Interferon gamma-induced protein 10</b><br>IP-10                               | 5pg/ml – 5000pg/ml and<br>10000pg/ml | 75pg/ml – 3713pg/ml         |
| 20 | <b>Macrophage migration inhibitory factor</b><br>MIF or MMIF                                                                       | 0,5pg/ml – 5000pg/ml                 | 200pg/ml – 10000pg/ml       |
| 21 | <b>Macrophage inflammatory protein-1<math>\alpha</math></b><br>MIP-1 $\alpha$<br>Or <b>Chemokine (C-C motif) ligand 3</b><br>CCL-3 | 0,5pg/ml – 5000pg/ml                 | 1pg/ml – 35pg/ml            |
| 22 | <b>Platelet-derived growth factor – bb chains or subunit B</b><br>PDGF-bb                                                          | 0,5pg/ml – 5000pg/ml                 | 25pg/ml – 2793pg/ml         |
| 23 | <b>Chemokine (C-C motif) ligand 5</b><br>CCL-5<br>Or <b>regulated on activation, normal T cell expressed and secreted RANTES</b>   | 0,05ng/ml – 500ng/ml                 | 175pg/ml – 7285pg/ml        |
| 24 | <b>Stem Cell Factor</b><br>SCF                                                                                                     | 0,5pg/ml – 5000pg/ml                 | 1,5pg/ml – 237pg/ml         |
| 25 | <b>Tumor necrosis factor alpha</b><br>TNF- $\alpha$                                                                                | 0,6pg/ml – 6000pg/ml                 | 1,5pg/ml – 1460pg/ml        |
| 26 | <b>Vascular cell adhesion molecule 1</b><br>VCAM-1<br>or <b>cluster of differentiation 106</b><br>CD106                            | 0,05ng/ml – 500ng/ml                 | 13240pg/ml –<br>111452pg/ml |
| 27 | <b>Vascular endothelial growth factor A</b><br>VEGF-A                                                                              | 0,5pg/ml – 5000pg/ml                 | 2pg/ml – 528pg/ml           |

Supplemental Table S1. List of mediators screened for effects on the HCV replication cycle. Concentration ranges used for in vitro screen as well as ranges measured by Luminex assay are indicated. nd – not done.
